# Supplementary material for: Effectiveness of a nutritional educational program for weight gain management among medical students in the faculty of medicine at Ain Shams University: an application of the health belief model
Source: Springer Nature journal article supplement (doi:10.1186/s41043-025-00803-8), 2025-04-02
Supplement: MOESM1 [file 41043_2025_803_MOESM1_ESM.pdf]

## Questionnaire in English

| Health Belief Model questionnaire for weight management behaviour                             |                                                                                     |                     |          |           |       |                  |
|-----------------------------------------------------------------------------------------------|-------------------------------------------------------------------------------------|---------------------|----------|-----------|-------|------------------|
| <b>Perceived severity</b>                                                                     |                                                                                     | Completely disagree | Disagree | Undecided | Agree | Completely agree |
| Being overweight could ...                                                                    | <i>Emotional/mental health subscale</i>                                             |                     |          |           |       |                  |
|                                                                                               | 1. Make me feel anxious and stressed                                                |                     |          |           |       |                  |
|                                                                                               | 2. Cause others to find me less physically attractive.                              |                     |          |           |       |                  |
|                                                                                               | 3. Make me unhappy and depressed.                                                   |                     |          |           |       |                  |
|                                                                                               | 4. Lower my self-esteem.                                                            |                     |          |           |       |                  |
|                                                                                               | <i>Physical health/fitness subscale</i>                                             |                     |          |           |       |                  |
|                                                                                               | 5. Makes it harder to do the physical activity or sports that I enjoy.              |                     |          |           |       |                  |
|                                                                                               | 6. Makes it harder to get enough sleep.                                             |                     |          |           |       |                  |
|                                                                                               | 7. Cause pain in my knees.                                                          |                     |          |           |       |                  |
|                                                                                               | 8. Have an adverse effect on my health in years to come.                            |                     |          |           |       |                  |
|                                                                                               | 9. increases my risk for diabetes, high blood pressure, cancer and other illnesses. |                     |          |           |       |                  |
|                                                                                               | <i>Social/professional subscale</i>                                                 |                     |          |           |       |                  |
|                                                                                               | 10. Make it harder to make friends.                                                 |                     |          |           |       |                  |
|                                                                                               | 11. Makes it harder to get a job because of a lack of fitness.                      |                     |          |           |       |                  |
|                                                                                               | 12. Take fun out of socializing with friends.                                       |                     |          |           |       |                  |
| 13. Makes me unable to wear clothes I want.                                                   |                                                                                     |                     |          |           |       |                  |
| <b>Perceived susceptibility</b>                                                               |                                                                                     | Completely disagree | Disagree | Undecided | Agree | Completely agree |
| I could become susceptible to being overweight if...                                          | <i>Lifestyle subscale</i>                                                           |                     |          |           |       |                  |
|                                                                                               | 1. I get <30 min of moderate-intensity physical activity on most days               |                     |          |           |       |                  |
|                                                                                               | 2. I consume sugary beverages, foods, or snacks daily or on most days.              |                     |          |           |       |                  |
|                                                                                               | 3. I eat fried foods or snacks daily or on most days.                               |                     |          |           |       |                  |
|                                                                                               | 4. I eat at fast-food restaurants $\geq 3$ times/wk.                                |                     |          |           |       |                  |
|                                                                                               | 5. I don't pay attention to the amounts I eat or drink.                             |                     |          |           |       |                  |
|                                                                                               | <i>Environmental subscale</i>                                                       |                     |          |           |       |                  |
|                                                                                               | 6. One or both of my parents is overweight or obese.                                |                     |          |           |       |                  |
| 7. I have a genetic history of being overweight or obese.                                     |                                                                                     |                     |          |           |       |                  |
| <b>Perceived barriers</b>                                                                     |                                                                                     | Completely disagree | Disagree | Undecided | Agree | Completely agree |
| <i>Practical concerns subscale</i>                                                            |                                                                                     |                     |          |           |       |                  |
| 1. Lower-calorie beverages, foods, and snacks are too expensive                               |                                                                                     |                     |          |           |       |                  |
| 2. Grocery shopping and preparing healthy foods would take up too much of my time.            |                                                                                     |                     |          |           |       |                  |
| 3. Doing exercise/physical activity on most days would take up too much of my time.           |                                                                                     |                     |          |           |       |                  |
| 4. My job/studying means more to me than adopting healthy eating and physical activity habits |                                                                                     |                     |          |           |       |                  |
| <i>Emotional/mental health subscale</i>                                                       |                                                                                     |                     |          |           |       |                  |
| 5. I do not have any motivation to adopt healthy eating and physical activity habits          |                                                                                     |                     |          |           |       |                  |
| 6. I enjoy eating fried foods and snacks more than baked, grilled or steamed versions         |                                                                                     |                     |          |           |       |                  |

|                                                                                                     |                                                                                                            |                     |          |           |       |                  |
|-----------------------------------------------------------------------------------------------------|------------------------------------------------------------------------------------------------------------|---------------------|----------|-----------|-------|------------------|
| 7. I enjoy consuming sugary beverages, foods, and snacks more than lower-calorie versions           |                                                                                                            |                     |          |           |       |                  |
| 8. I often turn to food when I want to feel comforted                                               |                                                                                                            |                     |          |           |       |                  |
| <i>Awareness subscale</i>                                                                           |                                                                                                            |                     |          |           |       |                  |
| 9. I don't know where to find accurate information about achieving and maintaining a healthy weight |                                                                                                            |                     |          |           |       |                  |
| 10. I don't know how to plan physical activity into my daily schedule                               |                                                                                                            |                     |          |           |       |                  |
| 11. I don't know where to shop for healthy beverages, foods, or snacks.                             |                                                                                                            |                     |          |           |       |                  |
| 12. I don't know how to prepare low-calorie beverages, foods, or snacks.                            |                                                                                                            |                     |          |           |       |                  |
| 13. I don't know how to choose low-calorie beverages, foods, or snacks.                             |                                                                                                            |                     |          |           |       |                  |
| <b>Perceived benefits</b>                                                                           |                                                                                                            | Completely disagree | Disagree | Undecided | Agree | Completely agree |
| It would benefit me to adopt healthy eating and physical activity habits by...                      | <i>Emotional/mental health subscale</i>                                                                    |                     |          |           |       |                  |
|                                                                                                     | 1. Reducing depression, anxiety and stress.                                                                |                     |          |           |       |                  |
|                                                                                                     | 2. Helping me to improve my body image.                                                                    |                     |          |           |       |                  |
|                                                                                                     | 3. Improve my self-esteem                                                                                  |                     |          |           |       |                  |
|                                                                                                     | 4. Improve my mood                                                                                         |                     |          |           |       |                  |
|                                                                                                     | <i>Physical health/fitness subscale</i>                                                                    |                     |          |           |       |                  |
|                                                                                                     | 5. Make it easier to do the exercise/sports I enjoy                                                        |                     |          |           |       |                  |
|                                                                                                     | 6. Make me feel more energetic                                                                             |                     |          |           |       |                  |
|                                                                                                     | 7. Increase my chances of having good health now and in the future                                         |                     |          |           |       |                  |
|                                                                                                     | 8. Improve a symptom or health problem I have now                                                          |                     |          |           |       |                  |
|                                                                                                     | 9. Help me become more physically fit to improve my job performance                                        |                     |          |           |       |                  |
|                                                                                                     | 10. Help me sleep better                                                                                   |                     |          |           |       |                  |
|                                                                                                     | 11. Make it easier to accomplish my daily activities                                                       |                     |          |           |       |                  |
|                                                                                                     | <i>Social/professional subscale</i>                                                                        |                     |          |           |       |                  |
|                                                                                                     | 12. Providing a better marriage opportunity.                                                               |                     |          |           |       |                  |
|                                                                                                     | 13. Make me feel more comfortable around others                                                            |                     |          |           |       |                  |
| <b>Cue to action</b>                                                                                |                                                                                                            | Completely disagree | Disagree | Undecided | Agree | Completely agree |
| I would adopt healthy eating and physical activity habits if...                                     | <i>Internal cues</i>                                                                                       |                     |          |           |       |                  |
|                                                                                                     | 1. I looked in the mirror and was dissatisfied with my body                                                |                     |          |           |       |                  |
|                                                                                                     | 2. My clothes fit uncomfortably tight                                                                      |                     |          |           |       |                  |
|                                                                                                     | 3. I developed a health problem that can be improved by a healthy weight.                                  |                     |          |           |       |                  |
|                                                                                                     | 4. I believe others judge me unfairly based on my weight                                                   |                     |          |           |       |                  |
|                                                                                                     | 5. A healthy weight would help me achieve my personal/professional goals                                   |                     |          |           |       |                  |
|                                                                                                     | 6. A healthy weight would improve my depression, anxiety, or stress                                        |                     |          |           |       |                  |
|                                                                                                     | <i>External cues</i>                                                                                       |                     |          |           |       |                  |
|                                                                                                     | 7. A physician/nurse/dietitian advised me to be at a healthy weight                                        |                     |          |           |       |                  |
|                                                                                                     | 8. A loved one developed a serious health problem from being overweight or obese                           |                     |          |           |       |                  |
|                                                                                                     | 9. A family member or close friend advised me to be at a healthy weight                                    |                     |          |           |       |                  |
|                                                                                                     | 10. I was presented information about the health risks of being overweight/obese in a college course       |                     |          |           |       |                  |
|                                                                                                     | 11. I read on a radio, television or social media website about the health risks of being overweight/obese |                     |          |           |       |                  |

|                                                                                 |                                                                                         |                     |          |           |       |                  |
|---------------------------------------------------------------------------------|-----------------------------------------------------------------------------------------|---------------------|----------|-----------|-------|------------------|
|                                                                                 | 12. I saw an ad for a product or service that claimed to help me be at a healthy weight |                     |          |           |       |                  |
| <b>Perceived self-efficacy in dieting</b>                                       |                                                                                         | Completely disagree | Disagree | Undecided | Agree | Completely agree |
| <i>Habits and preferences subscale</i>                                          |                                                                                         |                     |          |           |       |                  |
| 1. I can eat three meals regularly.                                             |                                                                                         |                     |          |           |       |                  |
| 2. I can eat meals in moderate amounts.                                         |                                                                                         |                     |          |           |       |                  |
| 3. I can eat fresh food rather than processed one                               |                                                                                         |                     |          |           |       |                  |
| 4. I can refrain to eat sweets like candy and cookie.                           |                                                                                         |                     |          |           |       |                  |
| 5. I can refrain to eat fatty food like fried food.                             |                                                                                         |                     |          |           |       |                  |
| 6. I can refrain to drink carbonated drink like cola                            |                                                                                         |                     |          |           |       |                  |
| 7. I can eat various foods to avoid unbalance in diet.                          |                                                                                         |                     |          |           |       |                  |
| 8. I can refrain to eat just before going to bed.                               |                                                                                         |                     |          |           |       |                  |
| 9. I can eat slowly even when hungry                                            |                                                                                         |                     |          |           |       |                  |
| 10.I can stop to eat before filling stomach even the food is delicious.         |                                                                                         |                     |          |           |       |                  |
| 11.I can get up early to eat breakfast.                                         |                                                                                         |                     |          |           |       |                  |
| 12.I can refrain to watch TV or read book when I eat.                           |                                                                                         |                     |          |           |       |                  |
| 13.I can refuse to eat when my family members or friends offer foods.           |                                                                                         |                     |          |           |       |                  |
| <i>Emotional/mental health subscale</i>                                         |                                                                                         |                     |          |           |       |                  |
| 14.I can refrain to eat when I am bored.                                        |                                                                                         |                     |          |           |       |                  |
| 15.I can refrain to eat when I am hungry.                                       |                                                                                         |                     |          |           |       |                  |
| 16.I can refrain to eat when I am angry.                                        |                                                                                         |                     |          |           |       |                  |
| 17.I can refrain to eat when I am depressed.                                    |                                                                                         |                     |          |           |       |                  |
| 18.I can refrain to eat when I am anxious and excited.                          |                                                                                         |                     |          |           |       |                  |
| <b>Perceived self-efficacy in exercise</b>                                      |                                                                                         | Completely disagree | Disagree | Undecided | Agree | Completely agree |
| 1. I can walk for distance as far as 15 minutes walk.                           |                                                                                         |                     |          |           |       |                  |
| 2. I can exercise until getting short of breath.                                |                                                                                         |                     |          |           |       |                  |
| 3. I can exercise in cold weather.                                              |                                                                                         |                     |          |           |       |                  |
| 4. I can exercise in hot weather.                                               |                                                                                         |                     |          |           |       |                  |
| 5. I can exercise with friends after university.                                |                                                                                         |                     |          |           |       |                  |
| 6. I can exercise instead of watching TV in leisure time.                       |                                                                                         |                     |          |           |       |                  |
| 7. I can use stairs instead of elevators.                                       |                                                                                         |                     |          |           |       |                  |
| <b>Behavioral intention of weight management</b>                                |                                                                                         | Completely disagree | Disagree | Undecided | Agree | Completely agree |
| <i>Diet therapy subscale</i>                                                    |                                                                                         |                     |          |           |       |                  |
| 1. I intend to control diet to reduce weight within six months.                 |                                                                                         |                     |          |           |       |                  |
| 2. I intend to visit dietitian to reduce weight within six months.              |                                                                                         |                     |          |           |       |                  |
| 3. I intend to attend obese class if my college opens it.                       |                                                                                         |                     |          |           |       |                  |
| <i>Exercise therapy subscale</i>                                                |                                                                                         |                     |          |           |       |                  |
| 4. I intend to exercise by myself regularly to reduce weight within six months. |                                                                                         |                     |          |           |       |                  |
| 5. I intend to attend sport centre or class to reduce weight within six months. |                                                                                         |                     |          |           |       |                  |
